# Supplementary material for: Risk factors for foot ulceration in adults with end‐stage renal disease on dialysis: study protocol for a prospective observational cohort study
Source: Springer Nature journal article supplement (doi:10.1186/s13047-015-0110-9), 2015-01-01
Supplement: MOESM1 [file 9778376]

# Data Collection Form: Baseline Data

## 1. Participant Characteristics

Date of birth: / / Sex: Male <sub>1</sub> Female <sub>2</sub>

Height: \_\_\_\_\_m Weight: \_\_\_\_\_kg Body mass index: \_\_\_\_\_  
(kg/m<sup>2</sup>)

Smoking history: Past <sub>1</sub> Current <sub>2</sub> Never <sub>3</sub>

Living alone: Yes <sub>1</sub> No <sub>2</sub>

Ethnicity: <sub>1</sub> Indigenous Australian (Aboriginal or Torres Strait Islander)  
<sub>2</sub> English  
<sub>3</sub> European  
<sub>4</sub> American  
<sub>5</sub> African  
<sub>6</sub> Asian  
<sub>7</sub> Pacific Islander  
<sub>8</sub> Other \_\_\_\_\_

Cause of ESRD: Diabetic nephropathy <sub>1</sub>  
Hypertensive nephropathy <sub>2</sub>  
Chronic glomerulonephritis <sub>3</sub>  
Polycystic kidney disease <sub>4</sub>  
Reflux nephropathy <sub>5</sub>  
Renovascular disease <sub>6</sub>  
Vasculitis <sub>7</sub>  
Unknown <sub>8</sub>  
Other \_\_\_\_\_ <sub>9</sub>

Dialysis treatment: Haemodialysis <sub>1</sub> CAPD <sub>2</sub> APD <sub>3</sub>

Dialysis start date: \_\_\_\_\_ Duration of dialysis (months): \_\_\_\_\_

## 2. Comorbidities

Diabetes: Yes <sub>1</sub> No <sub>2</sub>

Type of diabetes: Type 1 <sub>1</sub> Type 2 <sub>2</sub>

Date of diagnosis: \_\_\_\_\_ Duration of diabetes (months): \_\_\_\_\_

**Retinopathy:** Yes <sub>1</sub> No <sub>2</sub>

**Known peripheral neuropathy:** Yes <sub>1</sub> No <sub>2</sub>

**Known peripheral arterial disease:** Yes <sub>1</sub> No <sub>2</sub>

**Lower extremity revascularisation procedure:** Yes <sub>1</sub> No <sub>2</sub>

**Hypertension (requiring medication):** Yes <sub>1</sub> No <sub>2</sub>

**Dyslipidaemia:** Yes <sub>1</sub> No <sub>2</sub>

**Ischaemic heart disease:** Yes <sub>1</sub> No <sub>2</sub>

**Congestive cardiac failure:** Yes <sub>1</sub> No <sub>2</sub>

**Cerebrovascular disease:** Yes <sub>1</sub> No <sub>2</sub>

**Osteoarthritis:** Yes <sub>1</sub> No <sub>2</sub>

**Inflammatory arthritis:** Yes <sub>1</sub> No <sub>2</sub>

**Other** \_\_\_\_\_

### 3. Laboratory Results

| Parameter                       | Blood test<br>1 | Blood test<br>2 | Blood test<br>3 | Average<br>result |
|---------------------------------|-----------------|-----------------|-----------------|-------------------|
| C-Reactive Protein (mg/L)       |                 |                 |                 |                   |
| Serum Albumin (g/dL)            |                 |                 |                 |                   |
| Total Calcium (mmol/L)          |                 |                 |                 |                   |
| Serum Phosphate<br>(mmol/L)     |                 |                 |                 |                   |
| Parathyroid Hormone<br>(pmol/L) |                 |                 |                 |                   |
| Glycated haemoglobin (%)        |                 |                 |                 |                   |
| Haemoglobin (g/L)               |                 |                 |                 |                   |

## 4. Risk Factors

### 4.1 History of Lower Extremity Complications

#### 4.1.1 Past Foot Ulceration

**Left foot**            Yes        <sub>1</sub>        No        <sub>2</sub>

**Right foot**            Yes        <sub>1</sub>        No        <sub>2</sub>

#### 4.1.2 Current Foot Ulceration

**Left foot**            Yes        <sub>1</sub>        No        <sub>2</sub>

**Right foot**            Yes        <sub>1</sub>        No        <sub>2</sub>

##### 4.1.2.1 Location

###### **Left Foot**

- <sub>1</sub>    Dorsal toes
- <sub>2</sub>    Plantar toes, forefoot, and midfoot
- <sub>3</sub>    Dorsal foot
- <sub>4</sub>    Heel
- <sub>5</sub>    Multiple areas of the foot

###### **Right Foot**

- <sub>1</sub>    Dorsal toes
- <sub>2</sub>    Plantar toes, forefoot, and midfoot
- <sub>3</sub>    Dorsal foot
- <sub>4</sub>    Heel
- <sub>5</sub>    Multiple areas of the foot

##### 4.1.2.2 Type

###### **Left Foot**

(Based on results of  
neurovascular assessment)

- Neuropathic        <sub>1</sub>
- Neuro-ischaemic    <sub>2</sub>
- Ischaemic            <sub>3</sub>
- Other                 <sub>4</sub>

###### **Right Foot**

(Based on results of  
neurovascular assessment)

- Neuropathic        <sub>1</sub>
- Neuro-ischaemic    <sub>2</sub>
- Ischaemic            <sub>3</sub>
- Other                 <sub>4</sub>

4.1.2.3 Duration

**Left foot**

Duration (months): \_\_\_\_\_

**Right foot**

Duration (months): \_\_\_\_\_

**4.1.3 Lower Extremity Amputation (LEA)**

**Left lower extremity**

Minor (below ankle) <sub>1</sub>      Major (above ankle) <sub>2</sub>      N/A <sub>3</sub>

Location of LEA: \_\_\_\_\_

**Right lower extremity**

Minor (below ankle) <sub>1</sub>      Major (above ankle) <sub>2</sub>      N/A <sub>3</sub>

Location of LEA: \_\_\_\_\_

**4.2 Neurological Assessment**

**4.2.1 Vibration Perception Threshold (Neurothesiometer)**

|                   | Trial 1<br>Volts (v) | Trial 2<br>Volts (v) | Trial 3<br>Volts (v) | Average<br>Volts (v) |
|-------------------|----------------------|----------------------|----------------------|----------------------|
| <b>Left Foot</b>  |                      |                      |                      |                      |
| <b>Right Foot</b> |                      |                      |                      |                      |

*Note.* Vibration perception threshold >25 V indicates peripheral neuropathy.

**4.2.2 Protective Sensation (Semmes-Weinstein 5.07/10g Monofilament)**

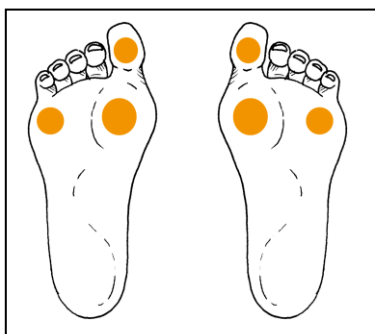

|                   | Sites<br>(Plantar hallux, plantar 1 <sup>st</sup> MTPJ<br>and plantar 5 <sup>th</sup> MTPJ) |
|-------------------|---------------------------------------------------------------------------------------------|
| <b>Left Foot</b>  | /3                                                                                          |
| <b>Right Foot</b> | /3                                                                                          |

*Note.* Inability to detect the monofilament at ≥1 site(s) indicates peripheral neuropathy.

### 4.3 Arterial Assessment

#### 4.3.1 Pedal Pulses

|            | Dorsalis Pedis | Posterior Tibial |
|------------|----------------|------------------|
| Left Foot  |                |                  |
| Right Foot |                |                  |

Note. P= palpable, NP= not palpable. Absence of  $\geq 2$  pedal pulses on both feet indicates peripheral arterial disease.

#### 4.3.2 Ankle-Brachial Pressure Index (ABPI) and 4.3.3 Toe-Brachial Pressure Index (TBPI)

|                                   | Left | Right |
|-----------------------------------|------|-------|
| Toe Systolic Pressure (mmHg)      |      |       |
| Ankle Systolic Pressure (mmHg)    |      |       |
| Brachial Systolic Pressure (mmHg) |      |       |
| ABPI value                        |      |       |
| TBPI value                        |      |       |

Note. ABPI= ankle-brachial pressure index; TBPI= toe-brachial pressure index.  $ABPI \leq 0.9$  or  $TBPI \leq 0.6$  indicates peripheral arterial disease.  $ABPI > 1.3$  or non-compressible arteries (i.e.  $> 240$  mm Hg) indicates arterial calcification.

### 4.4 Biomechanical Assessment

#### 4.4.1 Range of Motion

|                      | Left Foot | Right Foot |
|----------------------|-----------|------------|
| 1 <sup>st</sup> MTPJ |           |            |

Note. MTPJ= metatarsophangeal joint. Range of motion  $< 65^\circ$  indicates limited joint mobility of the 1<sup>st</sup> MTPJ.

#### 4.4.2 Foot Deformity

|                                                                 | Left Foot | Right Foot |
|-----------------------------------------------------------------|-----------|------------|
| Hammer/Claw Toes <sub>1</sub>                                   |           |            |
| HAV <sub>2</sub>                                                |           |            |
| Bony Prominences <sub>3</sub> (e.g. prominent metatarsal heads) |           |            |
| Charcot Neuroarthropathy <sub>4</sub>                           |           |            |
| Other <sub>5</sub> (e.g. forefoot pad atrophy, amputation)      |           |            |

Note. P= present, A= absent. HAV= hallux abducto valgus. HAV graded in accordance with the Manchester Scale. No deformity= 1, mild deformity= 2, moderate deformity= 3, severe deformity= 4. Foot deformity recorded with the presence of  $\geq 1$  foot deformities.

#### 4.4.3 Plantar Pressures

##### Left foot

Trial:                      1                       2                       3

**Right foot**

**Trial:** 1  2  3

**4.5 Footwear Assessment**

**4.5.1 Fit**

**Length:** Good (thumbs width) <sub>1</sub> Too short (<½ thumb) <sub>2</sub> Too long (>1½ thumb) <sub>3</sub>  
*(palpation)*

**Width:** Good <sub>1</sub> Too narrow <sub>2</sub> Too wide <sub>3</sub>  
*(grasp test)*

**Depth:** Good <sub>1</sub> Too shallow <sub>2</sub>

**4.5.2 General Features**

**Fixation:** None <sub>1</sub> Laces <sub>2</sub> Velcro <sub>3</sub>  
Straps/buckles <sub>4</sub> Zips <sub>5</sub>

**Forefoot Sole Flexion Point:**  
at level of MTPJs <sub>1</sub> proximal to 1<sup>st</sup> MTPJ <sub>2</sub> distal to 1<sup>st</sup> MTPJ <sub>3</sub>

**Heel Height:** 0-2.5cm <sub>1</sub> 2.6-5.0cm <sub>2</sub> >5.0cm <sub>3</sub>

**Materials:** Leather <sub>1</sub> Synthetic <sub>2</sub> Mesh <sub>3</sub>  
*(upper)*  
Other<sub>4</sub> \_\_\_\_\_

**4.5.3 Type**

**Footwear Style:**

Walking shoe <sub>1</sub> Ugg-boot <sub>6</sub> Court shoe <sub>11</sub>  
Boot <sub>2</sub> Backless slipper <sub>7</sub> Moccasin <sub>12</sub>  
Slipper <sub>3</sub> Surgical/bespoke <sub>8</sub> Thong/flip-flop <sub>13</sub>  
Sandal <sub>4</sub> Oxford shoe <sub>9</sub> Mule <sub>14</sub>  
Athletic shoe <sub>5</sub> High heel <sub>10</sub> Other<sub>15</sub> \_\_\_\_\_

**4.5.4 Condition**

**Age of Shoe:** 0-6 months <sub>1</sub> 6-12 months <sub>2</sub> >12 months <sub>3</sub>

## **4.6 Dermatological Assessment**

### ***4.6.1 Skin Pathology***

|                                     | <b>Left foot</b> | <b>Right foot</b> |
|-------------------------------------|------------------|-------------------|
| <b>Hyperkeratosis<sub>1</sub></b>   |                  |                   |
| <b>Heloma Dura<sub>2</sub></b>      |                  |                   |
| <b>Uraemic Pruritus<sub>3</sub></b> |                  |                   |
| <b>Xerosis<sub>4</sub></b>          |                  |                   |
| <b>Calciphylaxis<sub>5</sub></b>    |                  |                   |
| <b>Other<sub>6</sub></b>            |                  |                   |

*Note.* P= present, A= absent. Skin pathology recorded with the presence of ≥1 skin pathologies. Xerosis graded in accordance with the Xerosis Severity Scale. Mild= 1-2, moderate= 3-4, severe= 5-6.

### ***4.6.2 Nail Pathology***

|                                       | <b>Left foot</b> | <b>Right foot</b> |
|---------------------------------------|------------------|-------------------|
| <b>Half-and-Half Nail<sub>1</sub></b> |                  |                   |
| <b>Absent Lunula<sub>2</sub></b>      |                  |                   |
| <b>Onychomycosis<sub>3</sub></b>      |                  |                   |
| <b>Onychocryptosis<sub>4</sub></b>    |                  |                   |
| <b>Onychia<sub>5</sub></b>            |                  |                   |
| <b>Other<sub>6</sub></b>              |                  |                   |

*Note.* P= present, A= absent. Nail pathology recorded with the presence of ≥1 nail pathologies.

## **4.7 Foot Health Care Behaviours/Podiatry Attendance**

### ***4.7.1 Provision of Foot Care***

#### Daily Foot Care

**Inspection of Feet:** Yes <sub>1</sub> No <sub>2</sub>

#### Other

**Avoid Barefoot Walking:** Yes <sub>1</sub> No <sub>2</sub>

**Flexibility to Reach Feet:** Yes <sub>1</sub> No <sub>2</sub>

**Treatment of nails and skin lesions:** Yes <sub>1</sub> No <sub>2</sub>

**4.7.2 Podiatry Attendance**

**Seen a Podiatrist:** Yes <sub>1</sub> No <sub>2</sub>

**Number of times attended a podiatrist in the last 12 months** \_\_\_\_\_
