# Supplementary material for: Risk factors for foot ulceration in adults with end‐stage renal disease on dialysis: study protocol for a prospective observational cohort study
Source: Springer Nature journal article supplement (doi:10.1186/s13047-015-0110-9), 2015-01-01
Supplement: MOESM2 [file 7114874]

# Data Collection Form: Prospective Data (12-month follow-up)

Baseline assessment date: \_\_\_\_\_ Follow-up assessment date: \_\_\_\_\_

## 1. Recurrent Foot Ulceration

### 1.1 Baseline foot ulcer?

**Left foot** Yes <sub>1</sub> No <sub>2</sub> Location(s): \_\_\_\_\_

**Right foot** Yes <sub>1</sub> No <sub>2</sub> Location(s): \_\_\_\_\_

*If no, continue to Section 2 (New Foot Ulceration)...*

### 1.2 Healing of baseline foot ulcer?

**Left foot** Yes <sub>1</sub> No <sub>2</sub> Location(s): \_\_\_\_\_

**Right foot** Yes <sub>1</sub> No <sub>2</sub> Location(s): \_\_\_\_\_

Date of healed foot ulcer(s): \_\_\_\_\_

### 1.3 Recurrent breakdown of baseline foot ulcer?

**Left foot** Yes <sub>1</sub> No <sub>2</sub> Location(s): \_\_\_\_\_

**Right foot** Yes <sub>1</sub> No <sub>2</sub> Location(s): \_\_\_\_\_

Date of reoccurring foot ulcer breakdown(s): \_\_\_\_\_

## 2. New Foot Ulceration

### 2.1 New foot ulcer?

**Left foot** Yes <sub>1</sub> No <sub>2</sub> Location(s): \_\_\_\_\_

**Right foot** Yes <sub>1</sub> No <sub>2</sub> Location (s): \_\_\_\_\_

Date of discovered new foot ulcer(s): \_\_\_\_\_

## 3. New Lower Extremity Amputation

### 3.1 Baseline Lower Extremity Amputation?

**Left foot** Yes <sub>1</sub> No <sub>2</sub> Location(s): \_\_\_\_\_

**Right foot** Yes <sub>1</sub> No <sub>2</sub> Location(s): \_\_\_\_\_

### 3.2 New Lower Extremity Amputation(s)?

**Left** Yes <sub>1</sub> No <sub>2</sub> Location(s): \_\_\_\_\_

**Right** Yes <sub>1</sub> No <sub>2</sub> Location (s): \_\_\_\_\_

Date of new lower extremity amputation(s): \_\_\_\_\_

*If no, continue to Section 4 (Episodes of Infection of the Foot or Lower Extremity)...*

### 3.3 Reason for Lower Extremity Amputation?

Trauma <sub>1</sub> Do not record  
Tumour <sub>2</sub> Do not record  
Infected foot ulcer <sub>3</sub>  
Peripheral arterial disease/gangrene <sub>4</sub>  
Osteomyelitis <sub>5</sub>  
Other \_\_\_\_\_ <sub>6</sub>

## 4. Episodes of Infection of the Foot or Lower Extremity

### 4.1 Lower extremity infections?

**Left** Yes <sub>1</sub> No <sub>2</sub> Type: \_\_\_\_\_

**Right** Yes <sub>1</sub> No <sub>2</sub> Type: \_\_\_\_\_

## 5. Episodes of Osteomyelitis

### 5.1 Osteomyelitis episode(s)?

**Left foot** Yes <sub>1</sub> No <sub>2</sub>

**Right foot** Yes <sub>1</sub> No <sub>2</sub>

## 6. Foot-Related Hospitalisations

### 6.1 Foot-Related Hospital Admission(s)?

Yes <sub>1</sub> No <sub>2</sub>

Date of hospital admission(s): \_\_\_\_\_

Date of hospital discharge(s): \_\_\_\_\_

*If no, continue to Section 7 (Revascularisation Procedure of the Lower Extremity)...*

### 6.2 Reason for Hospital Admission?

Infected foot ulcer <sub>1</sub>  
Lower extremity amputation <sub>2</sub>

Lower extremity revascularisation procedure <sub>3</sub>  
 Peripheral arterial disease/gangrene <sub>4</sub>  
 Cellulitis <sub>5</sub>  
 Osteomyelitis <sub>6</sub>  
 Other \_\_\_\_\_ <sub>7</sub>

### 6.3 Foot-Related Treatments/Procedures Received During Hospital Admission?

Prescription of antibiotics <sub>1</sub>  
 Wound care/management <sub>2</sub>  
 Lower extremity revascularisation procedure <sub>3</sub>  
 Surgical debridement <sub>4</sub>  
 Issued an offloading device (e.g. TCC, CAM) <sub>5</sub>  
 Podiatry treatment <sub>6</sub>  
 Lower extremity amputation <sub>7</sub>  
 Other \_\_\_\_\_ <sub>8</sub>

## 7. Revascularisation Procedure of the Lower Extremity

### 7.1 Lower Extremity Revascularisation Procedure?

Yes <sub>1</sub> No <sub>2</sub> Type: \_\_\_\_\_

## 8. New Podiatry Interventions

### 8.1 New Attendance to Podiatry (since baseline)?

Yes <sub>1</sub> No <sub>2</sub> N/A <sub>3</sub>

### 8.2 New Podiatry Interventions Received (since baseline)?

Yes <sub>1</sub> No <sub>2</sub>

*If no, continue to Section 9 (Kidney Transplantation)...*

### 8.3 Types of New Podiatry Interventions?

Nail/callus reduction <sub>1</sub>  
 Wound care/management <sub>2</sub>  
 Prescription of foot orthoses <sub>3</sub>  
 Issued an offloading device (e.g. TCC, CAM) <sub>4</sub>  
 Padding/strapping <sub>5</sub>  
 Footwear education <sub>6</sub>  
 Foot care education <sub>7</sub>  
 Other \_\_\_\_\_ <sub>8</sub>

## 9. Kidney Transplantation

### 9.1 Kidney Transplant?

Yes <sub>1</sub> No <sub>2</sub>

Date of kidney transplant: \_\_\_\_\_

## 10. Mortality

### 10.1 Death during study period?

Yes <sub>1</sub> No <sub>2</sub>

Date of death: \_\_\_\_\_

10.2 Primary cause(s) of death: \_\_\_\_\_

10.3 Secondary cause(s) of death: \_\_\_\_\_

### 10.4 Foot-related death?

Yes <sub>1</sub> No <sub>2</sub>
